# Supplementary material for: Circadian Entrainment in Arabidopsis by the Sugar-Responsive Transcription Factor bZIP63
Source: PubMed Central journal article supplement (PMC6108399; doi:10.1016/j.cub.2018.05.092), 2018-08-20
Supplement: mmc1.pdf [file mmc1.pdf]

Current Biology, Volume 28

## Supplemental Information

### **Circadian Entrainment in *Arabidopsis***

#### **by the Sugar-Responsive Transcription Factor bZIP63**

**Alexander Frank, Cleverson C. Matioli, Américo J.C. Viana, Timothy J. Hearn, Jelena Kusakina, Fiona E. Belbin, David Wells Newman, Aline Yochikawa, Dora L. Cano-Ramirez, Anupama Chembath, Kester Cragg-Barber, Michael J. Haydon, Carlos T. Hotta, Michel Vincentz, Alex A.R. Webb, and Antony N. Dodd**

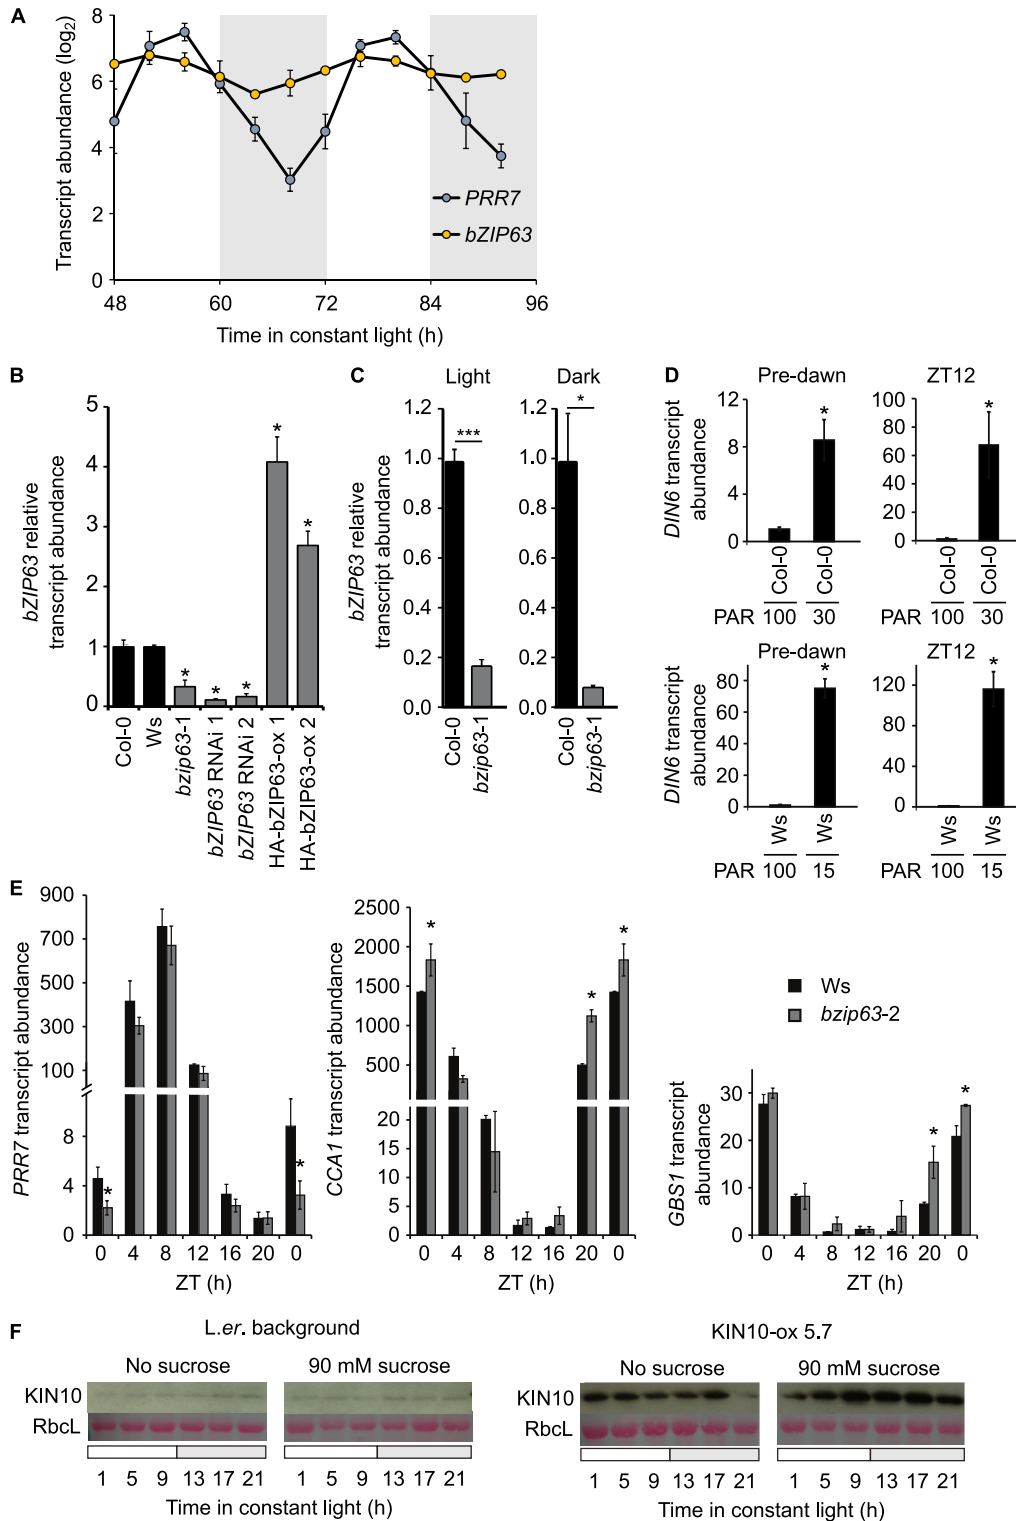

**Figure S1. bZIP63 regulates *PRR7* transcript accumulation and confirmation of *KIN10* overexpression. Related to Figure 1. (D) *bZIP63* transcripts have circadian oscillations in abundance that peak prior to *PRR7*. *bZIP63* transcript abundance peaked at ZT6 and *PRR7* transcript abundance peaked at ZT8 ( $n = 2$ ). Data**

comprise a 48 h timecourse of transcript abundance in constant light extracted from data deposited at <http://www.ncbi.nlm.nih.gov/geo/query/acc.cgi?acc=GSE19271>.

(B) *bZIP63* transcript abundance in *bzip63* mutants and transgenic lines at ZT0. Plants were grown for 30 days under  $100 \mu\text{mol m}^{-2} \text{s}^{-1}$  of cool white fluorescent light, and photoperiod of 12 h light 12 h dark. RNAi lines 1 and 2 and HA-*bZIP63*-ox 2 were within the Ws background, and HA-*bZIP63*-ox 1 was in a homozygous line harbouring the T-DNA FLAG\_610A08 within the *bZIP63* coding sequence. (C) Confirmation that *bZIP63* transcript accumulation is reduced in the *bzip63-1* mutant. Seedlings were grown in MS/2 liquid medium for 7 days under continuous  $60 \mu\text{mol m}^{-2} \text{s}^{-1}$  photon flux of cool white fluorescent light, and transferred to dark for 24 hours (Dark), or maintained under light for the same conditions (Light). (D) Transcript abundance of the starvation marker *DIN6* under high and low light conditions, immediately before dawn and immediately before dusk (ZT24). Photosynthetically active radiation (PAR,  $\mu\text{mol m}^{-2} \text{s}^{-1}$ ) indicated below graph panels. (B-D) Transcript abundance is the mean of three biological replicates ( $n = 3$ ) normalized to *PP2AA3* and analyzed using Student's T-test; \*\*\* =  $P < 0.001$ ; \*\* =  $P < 0.01$ ; \* =  $P < 0.05$ . (E) Transcript abundance of *PRR7*, *CCA1* and the direct *CCA1* target *GBS1* in Ws and *bzip63-2* plants grown for 30 days under 12 h light / 12 h dark cycles of  $100 \mu\text{mol m}^{-2} \text{s}^{-1}$  white light. (F) Western blot analysis confirms *KIN10* protein overexpression in *KIN10*-ox line [S1]. *KIN10* protein abundance shown relative to the Rubisco large subunit band (RbcL) on the same blot stained with Ponceau red. Samples were collected and processed in parallel, with *L. er.* and *KIN10*-ox samples run on separate gels. (D, F) Grey panels on timecourses indicate subjective dark period.

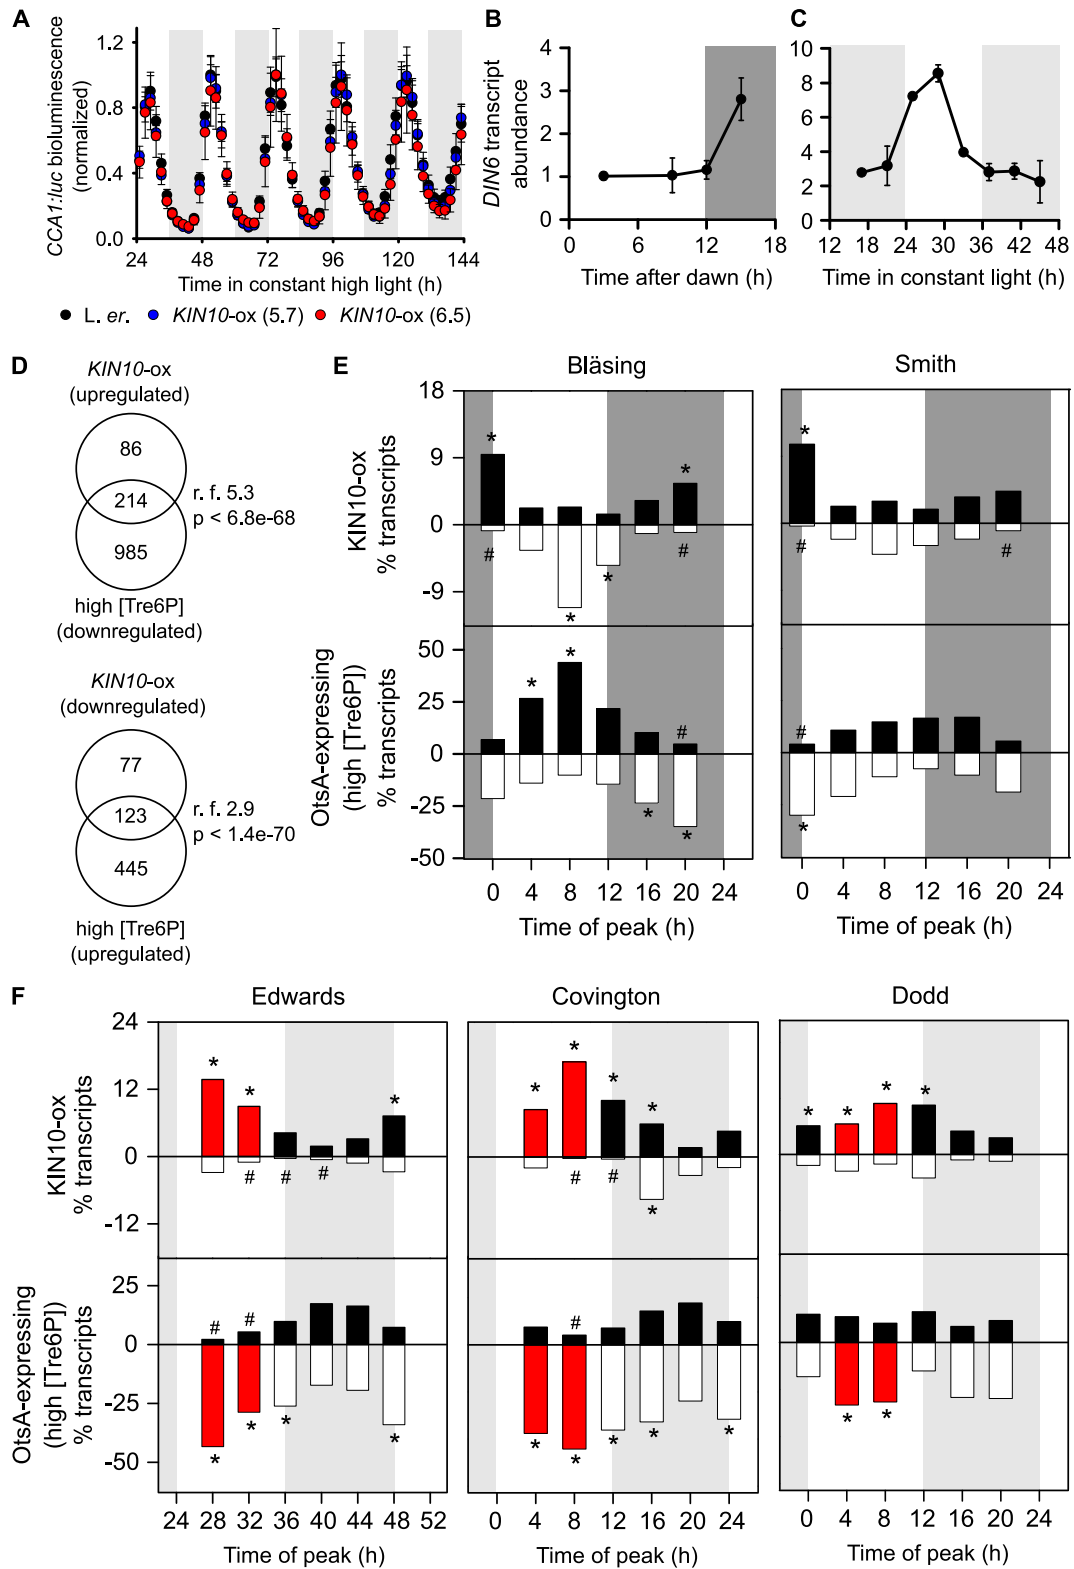

**Figure S2. Interaction between circadian regulation and sugar signalling.**

**Related to Figure 3.** (A) Circadian oscillations of *CCA1:luc* activity in *L. er.* wild type and two constitutive *KIN10* overexpressors under high light ( $50 \mu\text{mol m}^{-2} \text{s}^{-1}$ ).

Circadian periods were *L. er.*  $23.5 \pm 0.1$  h; KIN10-ox (5.7)  $23.6 \pm 0.1$  h; KIN10-ox (6.5)  $23.6 \pm 0.1$  h.  $n = 6 \pm$  s.e.m. (B) *DIN6* transcript abundance in seedlings under cycles of 12 h high light / 12 h darkness. (C) *DIN6* transcript abundance under continuous light in seedlings entrained previously to cycles of 12 h light / 12 h darkness. Experiments performed without sucrose supplementation.  $n = 3; \pm$  s.e.m. under  $50 \mu\text{mol m}^{-2} \text{s}^{-1}$  photon flux. (D-F) *In silico* analysis reveals intersection between transcripts that were altered in lines where the KIN10 pathway was misregulated [S1, S2]. (D) Statistically significant sets of transcripts are regulated by both KIN10 and Tre6P, demonstrated by intersections between transcripts upregulated by KIN10 overexpression and downregulated by high [Tre6P] (which would be predicted to suppress KIN10 activity), and transcripts downregulated by KIN10 overexpression and upregulated by high [Tre6P] (which would be predicted to increase KIN10 activity). The representation factor (r. f.) is the actual number of transcripts in the overlaps, divided by the expected number of transcripts in the overlap if the interaction were random. (E) Rhythmic transcripts identified from two light/dark experiments [S3, S4] and (F) three circadian experiments in constant light [S5-S7] that are also regulated by Tre6P/KIN10. Transcripts are plotted by phase, showing upregulated (black bars) and downregulated (white bars) transcripts. Each overlap plotted as a proportion of the total number of rhythmic transcripts in each phase bin. \* indicates overlaps having more transcripts than expected than by chance, # indicates overlaps with fewer transcripts than expected by chance. Statistical significance and representation factor were estimated using a hypergeometric test [S8]. Overlaps with  $P < 0.01$ , and representation factor  $< 0.5$  (#) or  $> 2$  (\*) were considered significant. Overlaps identified as statistically significant in all three circadian datasets are coloured red. In all panels, light and dark grey

shading indicates actual and subjective darkness, respectively.

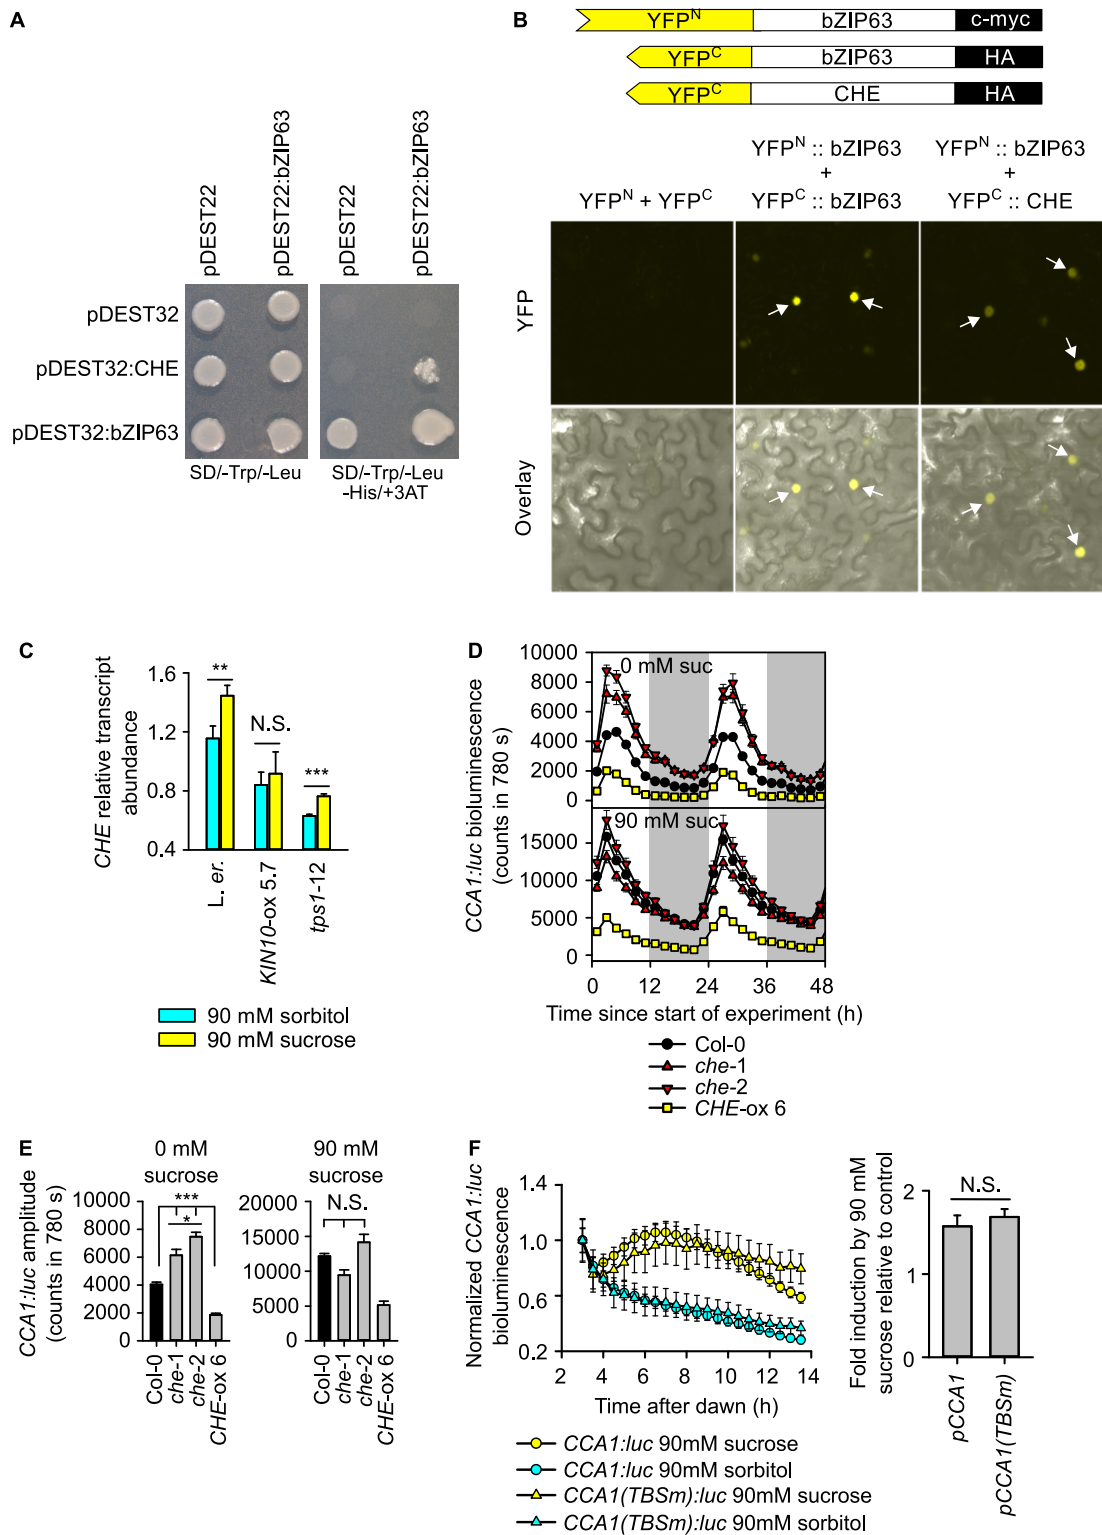

**Figure S3. bZIP63 interacts with CHE and CHE regulates CCA1 in a sucrose-dependent manner. Related to Figure 3.** (A) Yeast two-hybrid (Y2H) assay demonstrating interaction between bZIP63 and CHE proteins. *bZIP63* and *CHE* full-

length coding sequence cloned in pDEST32 were used as bait, and *bZIP63* in pDEST22 as prey. The combinations between empty pDEST32 and empty pDEST22 or pDEST22:*bZIP63*; pDEST32:*CHE* or pDEST32:*bZIP63* and empty pDEST22 vectors were used as negative controls for protein interaction. The combination of pDEST32:*bZIP63* and pDEST22:*bZIP63* was used as positive control, since *bZIP63* can form strong homodimers [S9]. Yeast growth of pDEST32:*bZIP63* + pDEST22 can be attributed to *bZIP63* transactivation activity. (B) Confocal laser scanning microscopy images of bimolecular fluorescence complementation (BiFC) of protein fusions *bZIP63*-YFP<sup>N</sup>, *bZIP63*-YFP<sup>C</sup> and *CHE*-YFP<sup>C</sup> transiently expressed in *Nicotiana benthamiana* leaves. The combinations YFP<sup>N</sup> + YFP<sup>C</sup> and *bZIP63*-YFP<sup>N</sup> + *bZIP63*-YFP<sup>C</sup> were used as negative and positive control for protein interaction, respectively (*bZIP63* can form homodimers). Arrowheads indicate position of the nucleus of abaxial epidermal cells. Images were obtained three days after infiltration with *Agrobacterium tumefaciens* carrying the constructs, and are representative of at least 30 independent observations for each vector combination. (C) Response of *CHE* transcripts to 1 h pulse of 90 mM sucrose; mean from two independent experiments ( $n = 3$  in each) analysed using Mann-Whitney U test. (D, E) *CHE* modulates the sensitivity of *CCA1* amplitude to sucrose under light/dark cycles ( $10 \mu\text{mol m}^{-2} \text{s}^{-1}$ ),  $n = 6 \pm$  s.e.m. Amplitude (E) is calculated from (D) and statistical significance from one-way ANOVA and post-hoc Tukey analysis. Grey panels on timecourse indicate periods of darkness. (F) Upregulation of the *CCA1* promoter by a 90 mM sucrose pulse at ZT3, under low light conditions ( $10 \mu\text{mol m}^{-2} \text{s}^{-1}$  photon flux), does not require the *CHE*-interacting TCP transcription factor binding site (TBS) within the *CCA1* promoter. In *CCA1(TBSm):luc*, the TBS was removed from the



CCA1 promoter [S10]. Fold induction of the CCA1 promoter, 3 h after treatment with 90 mM sucrose is indicated on right hand graph (mean from 4 independent experiments each with  $n = 6$ ;  $P = 0.535$  from t test). \*\*\* =  $P < 0.001$ ; \* =  $P < 0.05$ ; N.S. =  $P \geq 0.05$ .

| <b>Primer</b>                                            | <b>Sequence</b>                 |
|----------------------------------------------------------|---------------------------------|
| Forward primer for cloning<br>bZIP63 CDS (overexpressor) | TCTAGAATGGAAAAAGTTTTCTCC        |
| Reverse primer for cloning<br>bZIP63 CDS (overexpressor) | GGATCCCTACTGATCCCCAACGCT        |
| Forward primer for cloning<br>bZIP63 CDS (RNAi)          | AAGCTTGGTACCTCACTGGTCGGTTAATGG  |
| Reverse primer for cloning<br>bZIP63 CDS (RNAi)          | TCTAGACTCGAGCACTTGTTATAGCACTGC  |
| Forward primer for cloning<br>DIN6 promoter              | CGTGGTACCTGGACATGAGTGCATGAC     |
| Reverse primer for cloning<br>DIN6 promoter              | GCGAAGCTTGAAGAAAGTGAAAAAGATCACG |
| PRR7 qRT-PCR primer<br>(forward)                         | TTCCGAAAGAAGGTACGATAC           |
| PRR7 qRT-PCR primer<br>(reverse)                         | GCTATCCTCAATGTTTTTTATGT         |
| PP2AA3 qRT-PCR primer<br>(forward)                       | CATGTTCCAAACTCTTACCTG           |
| PP2AA3 qRT-PCR primer<br>(reverse)                       | GTTCTCCACAACCGCTTGGT            |
| CHE qRT-PCR primer<br>(forward)                          | TAATGGGTGGTGGTGGTTCTG           |
| CHE qRT-PCR primer<br>(reverse)                          | TAATGGGTGGTGGTGGTTCTG           |

|                                         |                                  |
|-----------------------------------------|----------------------------------|
| DIN6 qRT-PCR primer<br>(forward)        | TTCACCTTTCGGCCTACGAT             |
| DIN6 qRT-PCR primer<br>(reverse)        | ATCGGCATGTTGTCAATTGC             |
| ACT2 qRT-PCR primer<br>(forward)        | TGAGAGATTCAGATGCCAGAA            |
| ACT2 qRT-PCR primer<br>(reverse)        | TGGATTCCAGCAGCTTCCAT             |
| ChIP PRR7 primer pair 1<br>(forward)    | GACGTTTTCTTACCCACCA              |
| ChIP PRR7 primer pair 1<br>(reverse)    | ATTGGCGAGGATTAGTGACG             |
| ChIP PRR7 primer pair 2<br>(forward)    | TGCTTTTGTATGGTTGGATTTTT          |
| ChIP PRR7 primer pair 2<br>(reverse)    | TGCTTTTGTATGGTTGGATTTTT          |
| BiFC CHE cloning primer<br>(forward)    | TAAGCAGGATCCATGGCCGACAACGACGGAGC |
| BiFC CHE cloning primer<br>(reverse)    | TAAGCAGGTACCACGTGGTTCGTGGTCGTC   |
| BiFC bZIP63 cloning primer<br>(forward) | TAAGCAGGATCCATGGAAAAAGTTTTCTCCG  |
| BiFC bZIP63 cloning primer<br>(reverse) | TAAGCAGGTACCCTGATCCCCAACGCTTC    |
| Y2H bZIP63 cloning primer               | CACCATGGAAAAAGTTTTCTCCGAC        |

(forward)

Y2H bZIP63 cloning primer      C T A C T G A T C C C C A A C G C T T C

(reverse)

---

**Table S1: Cloning and qRT-PCR primers. Related to STAR Methods.**

## Supplemental References

- S1. Baena-González, E., Rolland, F., Thevelein, J.M., and Sheen, J. (2007). A central integrator of transcription networks in plant stress and energy signalling. *Nature* *448*, 938-942.
- S2. Zhang, Y., Primavesi, L.F., Jhurreea, D., Andralojc, P.J., Mitchell, R.A.C., Powers, S.J., Schluepmann, H., Delatte, T., Wingler, A., and Paul, M.J. (2009). Inhibition of SNF1-related protein kinase 1 activity and regulation of metabolic pathways by trehalose-6-phosphate. *Plant Physiology* *149*, 1860-1871.
- S3. Smith, S.M., Fulton, D.C., Chia, T., Thorneycroft, D., Chapple, A., Dunstan, H., Hylton, C., Zeeman, S.C., and Smith, A.M. (2004). Diurnal changes in the transcriptome encoding enzymes of starch metabolism provide evidence for both transcriptional and posttranscriptional regulation of starch metabolism in *Arabidopsis* leaves. *Plant Physiology* *136*, 2687-2699.
- S4. Bläsing, O.E., Gibon, Y., Günther, M., Höhne, M., Morcuende, R., Osuna, D., Thimm, O., Usadel, B., Scheible, W.-R., and Stitt, M. (2005). Sugars and circadian regulation make major contributions to the global regulation of diurnal gene expression in *Arabidopsis*. *The Plant Cell* *17*, 3257-3281.
- S5. Dodd, A.N., Gardner, M.J., Hotta, C.T., Hubbard, K.E., Dalchau, N., Love, J., Assie, J.-M., Robertson, F.C., Jakobsen, M.K., Gonçalves, J., et al. (2007). The *Arabidopsis* circadian clock incorporates a cADPR-based feedback loop. *Science* *318*, 1789.
- S6. Covington, M.F., and Harmer, S.L. (2007). The circadian clock regulates auxin signaling and responses in *Arabidopsis*. *PLoS Biol* *5*, e222.

- S7. Edwards, K.D., Anderson, P.E., Hall, A., Salathia, N.S., Locke, J.C.W., Lynn, J.R., Straume, M., Smith, J.Q., and Millar, A.J. (2006). FLOWERING LOCUS C mediates natural variation in the high-temperature response of the *Arabidopsis* circadian clock. *The Plant Cell* 18, 639-650.
- S8. Kim, S.K., Lund, J., Kiraly, M., Duke, K., Jiang, M., Stuart, J.M., Eizinger, A., Wylie, B.N., and Davidson, G.S. (2001). A gene expression map for *Caenorhabditis elegans*. *Science* 293, 2087.
- S9. Ehlert, A., Weltmeier, F., Wang, X., Mayer, C.S., Smeekens, S., Vicente-Carbajosa, J., and Dröge-Laser, W. (2006). Two-hybrid protein–protein interaction analysis in *Arabidopsis* protoplasts: establishment of a heterodimerization map of group C and group S bZIP transcription factors. *The Plant Journal* 46, 890-900.
- S10. Pruneda-Paz, J.L., Breton, G., Para, A., and Kay, S.A. (2009). A functional genomics approach reveals CHE as a component of the *Arabidopsis* circadian clock. *Science* 323, 1481.
